# Supplementary material for: The Role of Inflammation in β-cell Dedifferentiation
Source: PubMed Central journal article supplement (PMC5524956; doi:10.1038/s41598-017-06731-w), 2017-07-24
Supplement: 41598_2017_6731_MOESM1_ESM.pdf [file 41598_2017_6731_MOESM1_ESM.pdf]

**Supplementary Files -**

**The Role of Inflammation in  $\beta$ -cell Dedifferentiation**

Thierry M. Nordmann<sup>1,3</sup>, Erez Dror<sup>1</sup>, Friederike Schulze<sup>1</sup>, Shuyang Traub<sup>1</sup>,  
Ekaterine Berishvili<sup>2</sup>, Charlotte Barbieux<sup>2</sup>, Marianne Böni-Schnetzler<sup>1</sup>,  
Marc Y. Donath<sup>1</sup>

<sup>1</sup>Clinic of Endocrinology, Diabetes and Metabolism University Hospital Basel and  
Department Biomedicine, University of Basel, 4031 Basel, Switzerland

<sup>2</sup>Department of Surgery Cell Isolation and Transplantation Center, Geneva University  
Hospitals and University of Geneva, Geneva, Switzerland.

<sup>3</sup>Corresponding author: t.nordmann@unibas.ch, # 0041'61'265 25 25

**a**

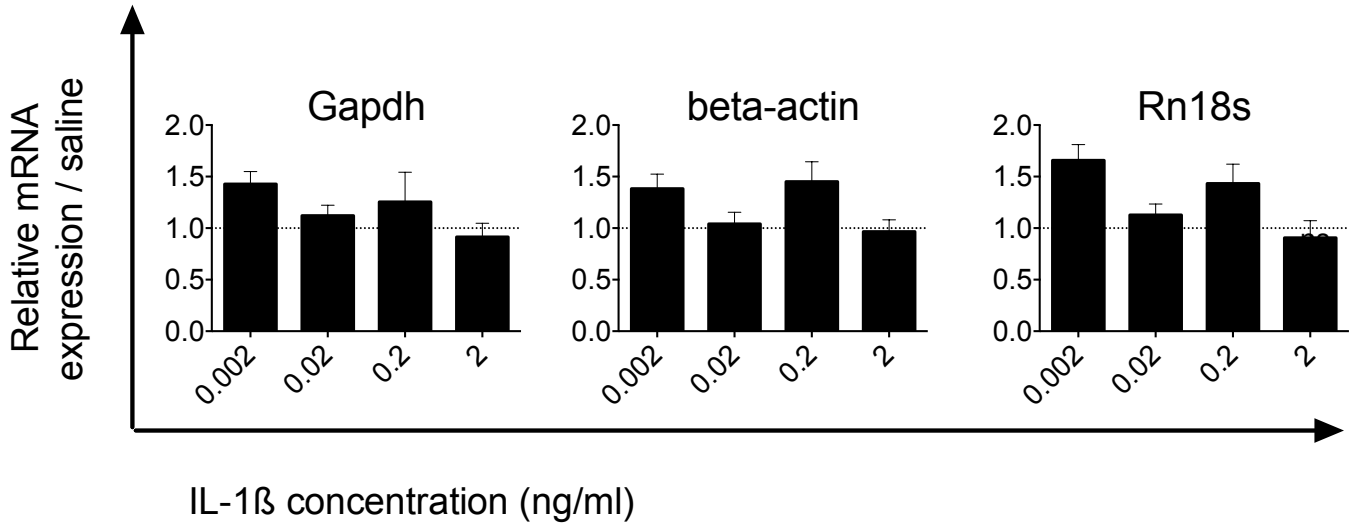

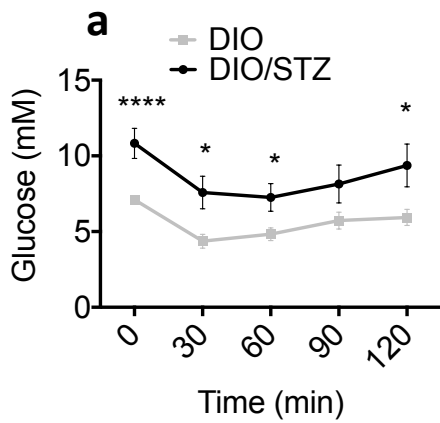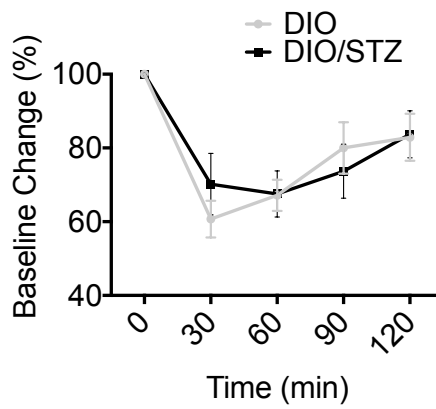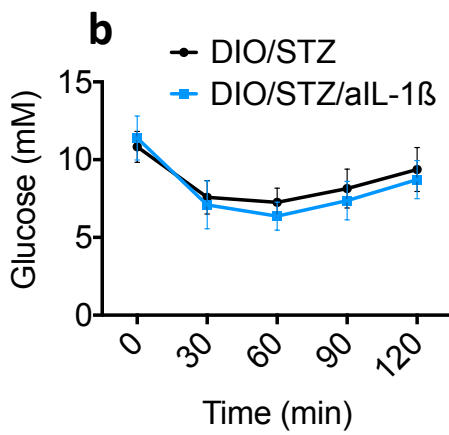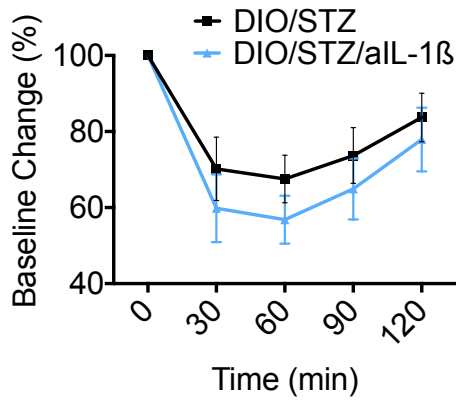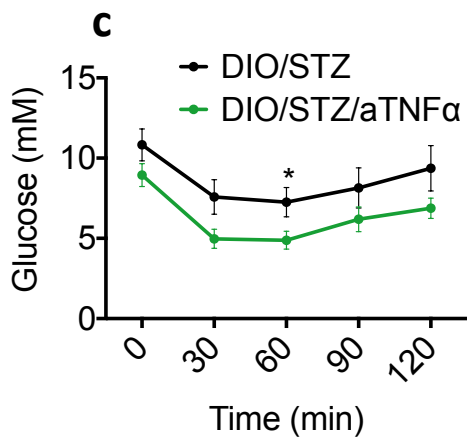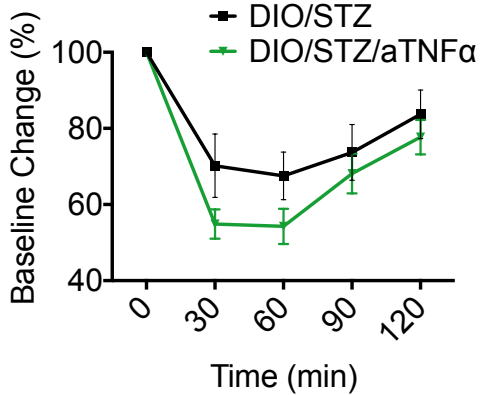

## **Supplementary Fig. 2.**

### **Housekeeping gene expression upon various doses of IL-1 $\beta$**

mRNA expression levels of the housekeeping genes *Gapdh*, *beta-actin* and *Rn18s* in mouse islets after 24 hours of exposure to various concentrations of IL-1  $\beta$  relative to solvent (dashed line).

(a-b) n=9-10 per condition, representing the sum of 3 independent experiments. (c) n=6-7 per condition, representing the sum of 2 independent experiments. \*P < 0.05, \*\*P < 0.01, \*\*\*P < 0.001, \*\*\*\*P < 0.0001 of treatment group vs. untreated control. Statistical significance (P) was determined using the two-tailed Mann-Whitney U. All error bars denote s.e.m.

## **Supplementary Fig. 3.**

### **Insulin tolerance test upon in vivo anti-inflammatory treatment**

Glucose levels and corresponding change from baseline following an ITT in (a) DIO and DIO/STZ, (b) DIO/STZ  $\pm$  aIL-1  $\beta$  treatment and (c) DIO/STZ  $\pm$  aTNF  $\alpha$  treatment.

n=10 each, pooled from 2 independent experiments. n represents the number of mice. \*P < 0.05, \*\*P < 0.01, \*\*\*P < 0.001, \*\*\*\*P < 0.0001. Statistical significance (P) was determined using the two-tailed Mann-Whitney U. All error bars denote s.e.m.

DIO, diet-induced obese; DIO/STZ, diet-induced obese / streptozotocin; ITT, insulin-tolerance test.
